# Supplementary material
Source: PubMed Central journal article supplement (PMC5563743)
Supplement: 12264_2016_21_MOESM1_ESM.pdf [file 12264_2016_21_MOESM1_ESM.pdf]

## Supplementary Materials

**Table S1. cDNA library screening with yeast mating.**

| Mating yeast [plasmid]                     | Type of SD plate | Anticipated colony phenotype |
|--------------------------------------------|------------------|------------------------------|
| Y2HGold [pGBKT7-53]×Y187<br>[pGADT7-T]     | QDO/X/A          | Blue                         |
| Y2HGold<br>[pGBKT7-lam]×Y187<br>[pGADT7-T] | QDO/X/A          | No colony                    |

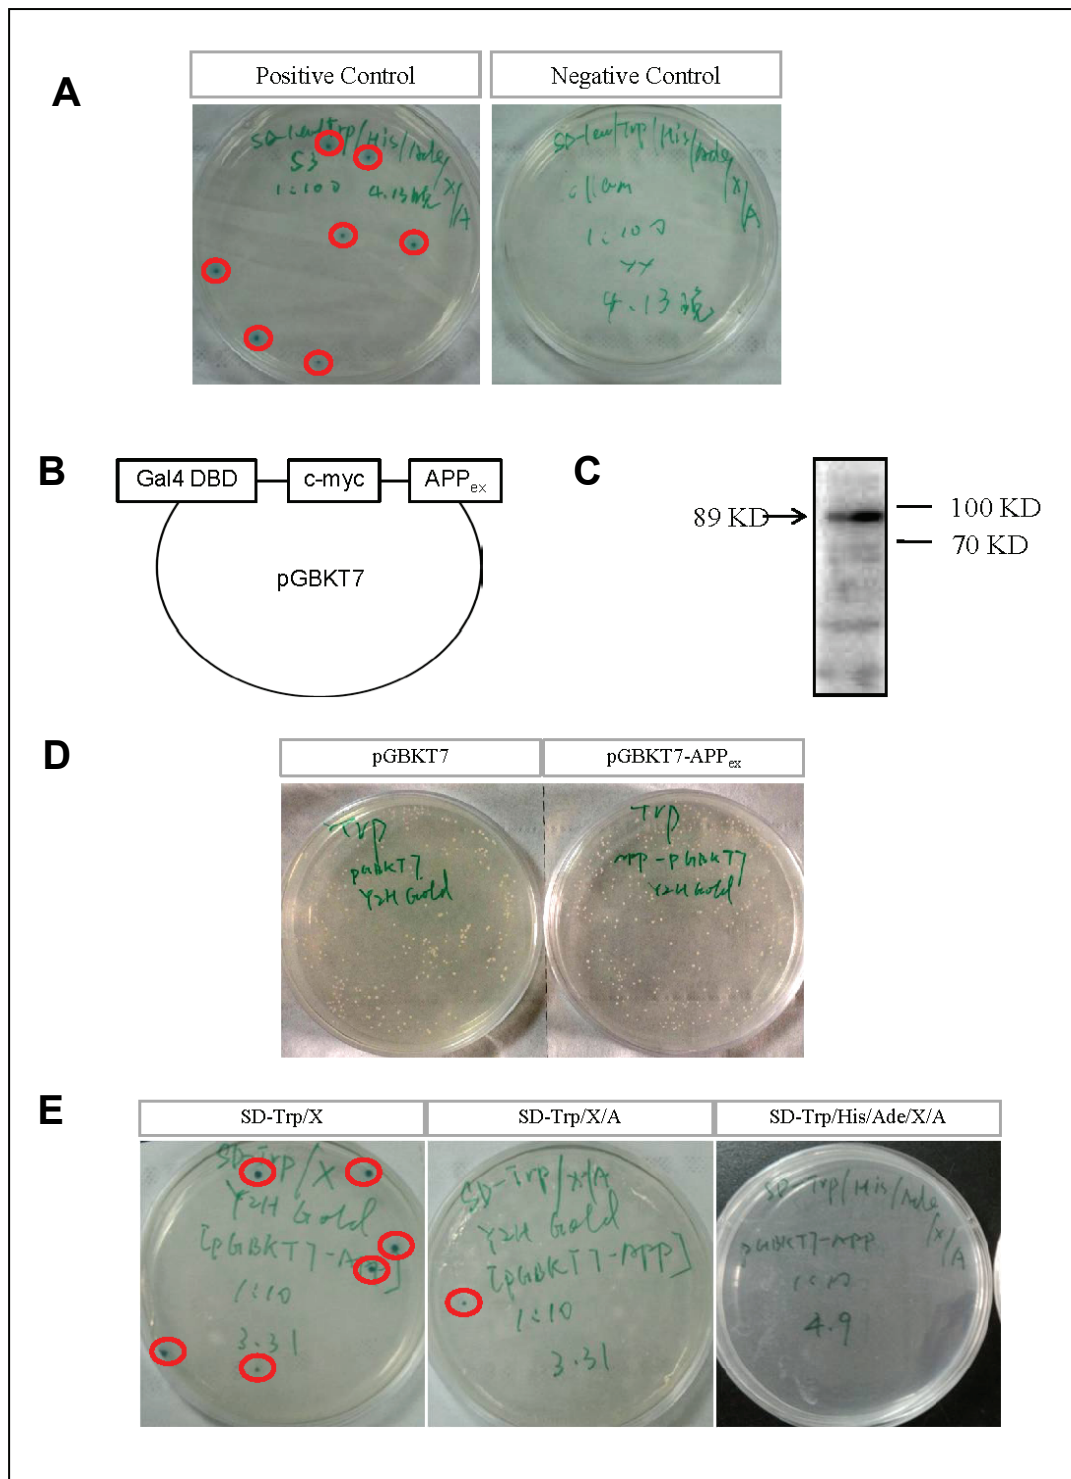

**Figure S1. Control experiment, cloning and testing APP<sub>ex</sub>-pGBKT7 for toxicity and autoactivation.** (A) Control experiment. The red circles indicated the colonies.

(B) The structure of APP<sub>ex</sub>-pGBKT7 bait clone. (C) Testing expression of

APP<sub>ex</sub>-pGBKT7 in Y2HGold strain. (D) Testing toxicity of APP<sub>ex</sub>-pGBKT7 in Y2HGold strain. (E) Testing autoactivation of APP<sub>ex</sub>-pGBKT7 in Y2HGold strain on three kinds of plates. The red circles indicated the colonies.

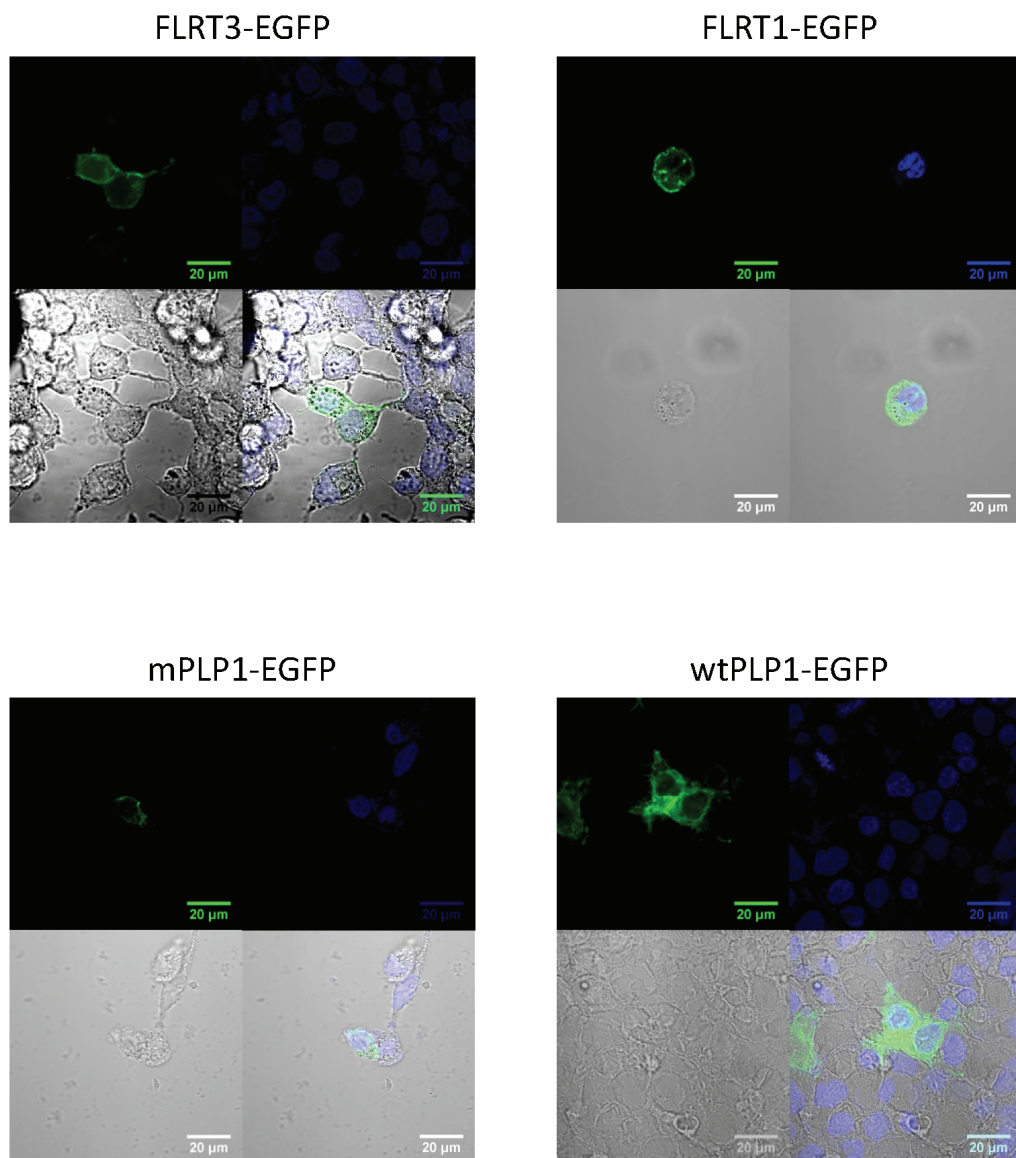

**Figure S2. The localization of membrane proteins in HEK293T cells.** HEK293T cells were transfected with FLRT3-EGFP, FLRT1-EGFP, mPLP1-EGFP and wtPLP1-EGFP and immunostained with DAPI.

IP: anti-c-myc (ecto-APP)  
IB: anti-EGFP (ecto-PLP1)

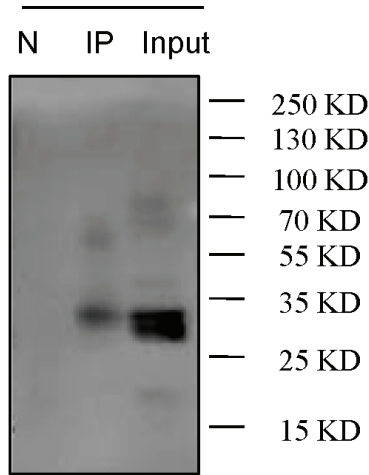

**Figure S3. Co-immunoprecipitation of APP extracellular domain with mPLP1 extracellular domain in HEK293T cells.** Cell lysates were immunoprecipitated with an anti-c-myc antibody for APP extracellular domain and probed with an anti-EGFP antibody for PLP1 extracellular domain (32 kD). N: negative control.

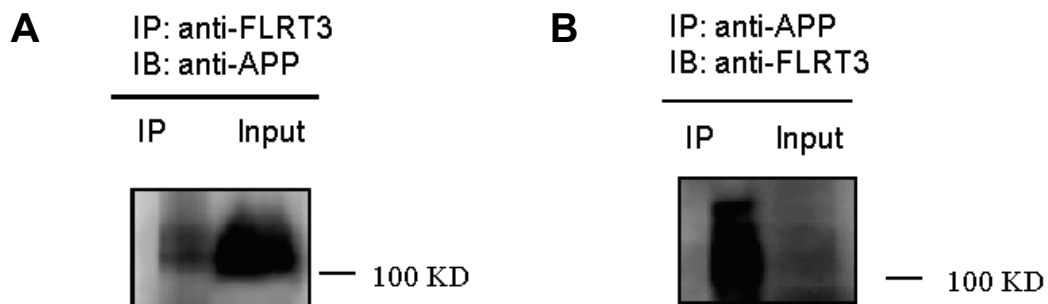

**Figure S4. Co-immunoprecipitation of APP with mPLP1 in cell lysates from ICR mouse brain cortex.** (A) Cell lysates from 10 weeks old ICR mouse brain cortex were immunoprecipitated with an FLRT3 antibody for FLRT3 and probed with an APP antibody for APP (about 100 kD). (B) Cell lysates from 10 weeks old ICR mouse



brain cortex were immunoprecipitated with an APP antibody for APP and probed with an FLRT3 antibody for FLRT3 (about 100 kD).

### **DNA sequence of screened products**

**PLP1:** GTTCCAAATGACCTTCCACCTGTTTATTGCTGCATTTGTGGGGGCTG  
CAGCTACACTGGTTTCCCTGCTCACCTTCATGATTGCTGCCACTTACAACCTT  
TGCCGTCCTTAA

**GPR137B:** ATCCTGTCATTTTCTCAGAACAAGAGCGTCCATTCCCTTTGATTAT  
GACCGGTACAATGTATCAGACCCGGCAGATTTGAAGAATCAGCTGGGAGAT  
GCTGGATACGTATTATTTGGAGTGGTGTTATTTGTTAGGGAACTCTTACCTAC  
CACCTTAGTCGTTTATTTCTTCCGAGTTAGAAATCCTACAAAGGACCTTACC  
AACCTGGAATGGTCCCCAGCCATGGATTGAGTCCCAGATCTTATTTCTTTG  
ACAACCCTCGAAGATATGACAGTGATGATGACCTTGCCTGGAACATTGCC  
CTCAGGGACTTCAGGGAGGTTTTGCTCCAGATTACTATGATTGGGGACAAC  
AACTAACAGCTTCCCTGGCACAAGCAGGAACCTTTGCAAGACTCAACTTTG  
GATCCTGACAAACCAAGCCTTGGGTAG

**FLRT3:** CATTGTCAGCAAAGCTTTGAAAATAAAGGACTTCACAAAACGGT  
AATGTAAATGTGCTTCCAAGTTGGGGGGAAAATGTGTACTTAGGAAAACAT  
GGAAACTTAGACTTGTATAGTGTAATGAACACAAATACCAAAACTGCATTTT  
GGTTTTGCCTATAACCATCCTGATTTTTGAAAAGTGAATTATAAACACAAAAT  
TGTTAGTGTTTATGATGTTTTTATCATAAAGGATGTCAGAGAACTTTATGCA  
TATATAAAATGTAATGTAATTATAAGCGATTCCTCAACAATCCAGAGAAA  
GTAGTTCTTTAAATAAGAGATAATTTAAAGAAAAATAAATACTAGACATCAA  
ATTTAGATCTGGTTTATGTCAAAGGTTTTAACACTGCACATAAATGTTCAATT  
TACTTTTACAAAGATCAAGAATACTGCCATTACTGTCACAATTTTCCAGAT  
ATTATATAATGAACTCGTAATGTAACATTTTCTTCTAGCTTCCTACTGAATTGT  
GAGCTGTTACTTGTTGAAAAACCATATCACTTTTCTGTTGCCATGATTTTTTT  
TTTTTCAACAAAAAACCAAAGTGCATTGTACGCCCTTTGGCCAGTCTTGTA  
TGTGCCTTGATCCAACGCTACATGTATTCAGCTTTTAAAACTCCACAAATTT  
TTCATACTCCTTAAATATGAAAAATTATGGTCTTATTGCTGAATAAAACTTTT  
AAAAAGTACAGAATAATTGTGCTTGCTTTTTTTCAGGATTGTGTTACTATCACT  
AAGTAGCAAATTGCCAGCACATTAGTCCTAAACGTCCCATGTATTTTCTAG  
GCATAAAAATAAAGTTGGCTAAAAATTTAAAAA

**KCTD16:** CAAATTTTGATTCTTATACATTTTCCCTTTGCTACAATTCCAACCTT  
CAACTTTGTATCTACTATAGTGTAGATCTGTGAATTTGAGTGCTGGTATTTT  
TGCCACTATATACCATGCCATGGAATTTGACTAGCCTTGGTCTTCTAGATGAT  
CTTTACTAGAATTAATAACTCTTTCTGTGAACTTTTAGGAAGAATTCTTTG

TCACCTCCACCTGACATACCAATTTTCAAAAAGAAAAACGAAGGGAGTTTAT  
TTTTCCTTATGGTGACTCTGTGGCAGATAAATGTTTTTGCCAATTTGCATGCT  
GGTTTATAGGTTTAGCATGGGCCATTTCTCTCTTTAATGTCTTGGTATTGTTG  
GTGTCTTGCAATCTTGATGCCCCACAGTTTCAATTTATTTATTTTCTTTTATAT  
TGTCAAAATAGCACACTAGAGAAAGAACCAGAGTGAACATTCTGTATCCTG  
AGTTACAATGGAGTTACATGTCATTTGTATAGAACTGTATAATGATTAATATC  
TGCAGAGAAATTAGACCAAATGAAACCTGCTGGAATAGGTTTGATTTATATT  
GCCTTCATCATTCTGGTTTCAGACGAAATGGTTATTGCTCTCTACCCCTGCT  
GAAAGAATAGAGTCTTAACTTTAATAATCACAGCCTTGTGATGCAAACAC  
AGAGCTTATTTGTTTGAAATGCCTATTATTCTCATCTTGCTGTATACGTTGGA  
ATGGAGATTCTTTTCCAGTGATCTCCATTGCAAACCTTTTAAATAGTGTTTTT  
TAATACTCAGTATGCACAAAATCATGTGTAGCACTTGTA AAAATGCAGATT  
CCTTCAACCTAACTTCAAAGAGTCTGATTCAGAACTTGAAGCAGGGCAA  
AGAAATTTGATTTTGTAGCTAGTCTCCTAATAATTTTGATGAGGATTGTCTA  
TAGACCTTACTTTGAAAAATTCTGCTGTTTAGGGAATATGCAGAGGCCAAG  
AGTTCCTTACTCCTTAGAAGCACTTCTCATTTTCTTACTTTCTTCCCAC  
TACAAATAAGTCAAAGCATGCATTATTC

**LRRC66:** CTTGAGTTTCAGTTGATTGAGTTTGTAATAACTAGTAATGAGCTT  
CTGTTTACAATAAAAATTCTGTAAATTGTTTGCTGTTAATTTTTTAAAGGGTTA  
TATATTAAGTGTCTTACTTAGTCATGCGAACGTGATGAATTTAAATATGGC  
TTGAGAATGGGACGCTGTCAGTATTTATGTAATCTCTCTGGACTCCTAGAAC  
TCAAAGTTAGAAAGTTGTACATTCCAAGTTTTGAATGCCCTCCTCTCTGTGC  
ATTGCAGAAGGCCTCTCTCCAGTGGTGCTTCCCTGGTGTCTAGGGGAAAG  
TGCACACTGTCACCATGGCAGGAGGCCAAAGCCGGAGATGAAAGGGTGA  
GGGCTGGCCACTGGGCAGCCTTGATGGCAGGTGGGGTGGAGCCTCAAAGG  
TTCAGGTCTTAAATCCCTACCTGGCTTGATCCAGATATCCACCCATTTGATAA  
CCACTTAGGATACGAAGGTATGTCTTAAAGGCATTATTACTTTCCAGGTCTT  
GTCCTTACCCGAAATAGCCTCTGTTGCTTTTTTCTTTCAGTTTTGCCACCCT  
TTCTTTTATGTATAAATGAACTCTTCATTTCCCTTCTATAATACTTTGTTTTTT  
GTGCTGCCTTCTTCTATCTTTCAGTTGCTGACTCACAAATGTACACACCCA  
GTATTTCTAACTGCTTCCCTCCTACTTCAGCTTGACTATTTCCATTTTGAAA

**KIAA0319:** CCCAAATGTAAAGTCATCGGGCGTAATGAGGAAGAAGGGAGT  
GAACATTTACCGCTTTATGTACATAACATATGCAGTTTACATACTCATTGAT  
CCTTATAATCAACCTTGAAGAGAAGATACTATCATTCTTATGTTGCAGATAGC  
CCTCTGAAGGCCAGAGAGGTTAAGTAACTTCCCAGAGGTCATGGCCAAG  
AAGTAGTGGCTCCAAGAAGTGAATGCAAATTTTTTAACTGTAGAGTTCTG  
CTTTCCACTAAACAAAGAACTCCTGCCTTGATGGATGGAGGGCAAATTCTG  
GTGGAACTTTTGGGCCACCTGAAAGTTCTATTCCCAGGACTAAGAGGAGTT  
TCTTTTAAATGGATCCAGAGAGCCAAGGTCAGAGGGAGAGATGGCCTGCATA  
GTCTCCTGTGGATCACACCCGGGCCACCCCTCCCTCTAGGTTTACAGTGGA  
CTTCTTCTGCCCCCTCCTCCTTTTCTGTCTTGGCCATCTCAGCCTGGCCTCT  
CTGATCCTTCCATCACAGAAGGATCTTGAATCTCTGGGAAATCAAACATCA

CAGTAGTGATCAGAAAGTGAGTCCTGTCTTGTCACCCCATTTCTCATCAGA  
ACAAAGCACGAGATGGAATGACCAACCAGCATTCTTCATGGTGGACTGCTT  
ATCATTGAGGATCTTTGGGAGATAAAGCACGCTAAGAGCTCTGGACAGAGA  
AAAACAGGCCCTAGATATGGGAGTGGGTGTTTGTAGGGCTCACAGGCTA

**SEZ6L:** GAAAAGGCGTTGTGTTTTTTGTTTTTTGTTGTTGTTGTCATTGTTG  
TTTTTTTCAGAAGACCAGTGTCTCAGTTCTGTCTTAGTAGTACCACACCCGT  
AACCGTGTTTTAAAAGTTTGTTTTAGCCTAGAGACAGATCATACGAGTTCA  
ACAATGTACAGTGTGATTGAAAAGACAGGTTGGTGTCTATTTTTCTTTTTAA  
AATATCTGAATGTGTATTTGTAATACGTAAAGGTAAAAAAAATAGTGCCAA  
AAATGTGCAAGGCATCTCATTACAGCTCATGTACGTCTGTTTTTATAAGATC  
AATATTAACCCATTGGGATTAATATTTTTGAATAGGATACACTCTTGAGA  
AACTCGAGAATGGACTGAGCCTTCCACAAGCCACTCTTTGTTTTTAAAC  
AGTGGGGAAATACGTTTACAGAGATTGTGAGCTTCAGAGAATGCATGTGAT  
GGTGTGTATTACATGCTAATTCATATAAGCTGTATCTGTCAGCTACCACCCTG  
TGCTTTAAAATGCACACACTCAACCCTCTTAGCTTGGAGCTCAGCTTTTT  
GCTTTTTTTTTTTTTTTTGTAGAATTATTTAGCTAACATAAGTATTCTGATTGC  
TACCTGATGGCCATTCTTACTTAGTTTCATAGATGTGCTTTAACTATGATCCT  
TTGAAGCTCACCCCTTGGAGAGCCTACAGAACCTCAGCTGATAG

**RAB13:** ATGGAGTACCCATACGACGTACCAGATTACGCTCATATGAACATGG  
AGGCCAGTGAATTCCACCCAAGCAGTGGTATCAACGCAGAGTGGCCATTAC  
GGCCGGGGAACAACACTTACATCTCCACCATCGGAATTGATTTCAAGATCC  
GCACTGTGGATATAGAGGGGAAGAAGATCAAACACTACAAGTCTGGGACACG  
GCTGGCCAAGAGCGGTTCAAGACAATAACTACTGCCTACTACCGTGGAGCC  
ATGGGCATTATCCTAGTATACGACATCACGGATGAGAAATCTTTCGAGAATA  
TTCAGAACTGGATGAAAAGCATCAAGGAGAATGCCTCGGCTGGGGTGGAG  
CGCTCTTGCTGGGGAACAATGTGACATGGAGGCCAAGAGGAAGGTGCA  
GAAGGAGCAGGCCGATAAGTTGGCTCGAGAGCATGGAATCCGATTTTTCGA  
AACTAGTGCTAAATCCAGTATGAATGTGGATGAGGCTTTTAGTTCCCTGGCC  
CGGGACATCTTGCTCAAGTCAGGAGGCCGGAGATCAGGAAACGGCAACAA  
GCCTCCCAGTACTGACCTGAAAACCTGTGACAAGAAGAACAACAAGT  
GCTCCCTGGGCTGA

**TMEM30A:** ATGGAGTACCCATACGACGTACCAGATTACGCTCATATGAACA  
TGGAGGCCAGTGAATTCCACCCAAGCAGTGGTATCAACGCAGAGTGGCCA  
TTACGGCCGGGATTTATTCTGAAGATTGTCCCTCTTGCACTAGGCAGTTTA  
TTTTCGGGGATACATTGTTGGGGGAGAGGGGTTTCTGCCACTCTTTCCAGA  
TTGAGTCTGTGCTGTTTAAGGAGGACTACCATCCTGCAACTCTTTTTCTAAT  
TGGGGCACAGAGGATGTGCTAAAGAAAAGTTGAAGAGCCCTTTCAGCAC  
TTTCTCATCTGTGGAGAAGATGGAATCTTAAAATACATTTGGAGTTTTATCT  
GTTTTACAAGTCCATTGATGGCCTAAGTTCCTCCTGTTTTCTGCTGTTTGATC  
TCTAAGGAACTCCTGTTGTTAAATATGAAGAGTATGGAACATTCATATAGTC  
TCTGTGAAGCATGGGGGGAGGGAAGACATTTCTTTTTCTTATAGGCTTTATG

CTCAAATGTCATAGTCTCCTTTCAAAGAATTGTGTTGCATTTTAAATGCACC  
CAGCTTAAGTAGAAGACATTGAAGGATGCATTAATTTTCAGGAACTATTTG  
AATTATGAAAAGATTCCCAATTGAAAAAATTATTCAACAAGTAAAAGCTAA  
GAAATTTCAATTGAAATCATAAGGCAGTTTAAGCATAAATTGATAAAAATAGC  
TGTGTACTACTAATTAATAGAAAATCATTCAACCAAGAGAAGAGTCAAGTG  
AATATCGTTTGTTTATTTGCTAGTGAGTTTCTTTGTAACGTTGATTTTATAAA  
TGATAATATTTGGTTAGTATGTCCTATGTTAATAAAAATGAACAAAATTAATT  
TTGCTATGTTCAAGTGTCTTGATAAAATAACAATGCTCCAGTGTTGTTGCTTA  
CATTTAGCACTAAATTTTAACAACAGGTCAGTGAGTCCAGGTTTTAACTTCT  
CATGCCTGGATGGGATAAAATGTAATTCATTGTTAAATTATTCAATATTTGGT  
ATTTATTAATCACAC
